# Supplementary material for: Efficacy and acceptability of parent-only group cognitive behavioral intervention for treatment of anxiety disorder in children and adolescents: a meta-analysis of randomized controlled trials
Source: BMC Psychiatry. 2021 Jan 11;21:29. doi: 10.1186/s12888-020-03021-0 (PMC7802251; doi:10.1186/s12888-020-03021-0)
Supplement: Supplementary file 4 — Additional file 4. Graphical overview of the methodological quality of included studies. [file 12888_2020_3021_MOESM4_ESM.pdf]

|                        |                                             |                                         |                                                           |                                                 |                                          |                                      |            |
|------------------------|---------------------------------------------|-----------------------------------------|-----------------------------------------------------------|-------------------------------------------------|------------------------------------------|--------------------------------------|------------|
| Cartwright-Hatton 2011 | +                                           | +                                       | -                                                         | -                                               | +                                        | +                                    | ?          |
| Cobham 2017            | +                                           | ?                                       | -                                                         | -                                               | +                                        | +                                    | +          |
| Mendlowitz 1999        | ?                                           | ?                                       | -                                                         | -                                               | +                                        | +                                    | +          |
| Monga 2015             | ?                                           | ?                                       | -                                                         | +                                               | +                                        | +                                    | +          |
| Özyurt 2016            | +                                           | ?                                       | -                                                         | -                                               | ?                                        | -                                    | +          |
| Waters 2009            | ?                                           | ?                                       | +                                                         | +                                               | +                                        | +                                    | +          |
|                        | Random sequence generation (selection bias) | Allocation concealment (selection bias) | Blinding of participants and personnel (performance bias) | Blinding of outcome assessment (detection bias) | Incomplete outcome data (attrition bias) | Selective reporting (reporting bias) | Other bias |
